# Supplementary material for: Transcriptomics in Rare Minnow (Gobiocypris rarus) towards Attenuated and Virulent Grass Carp Reovirus Genotype II Infection
Source: MDPI journal article supplement (doi:10.3390/ani13111870), 2023-06-04
Supplement: s1 [file s1]

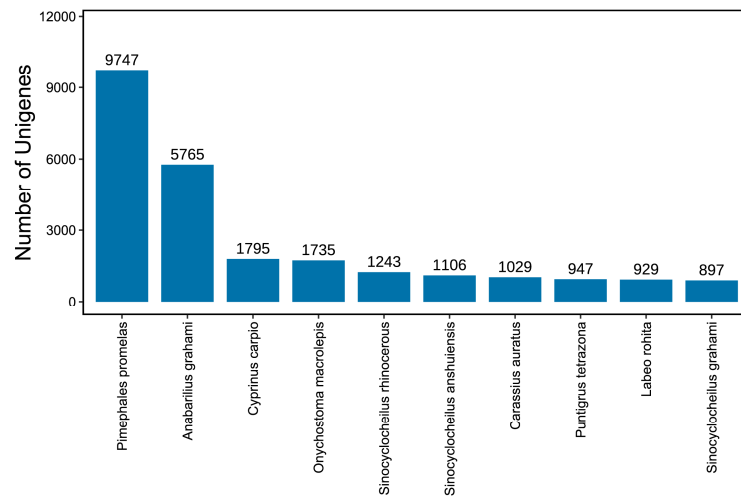

**Figure S1.** The Nr annotation summary of the *de novo* assembled transcriptome of rare minnow spleen and liver.
